# Supplementary material
Source: PubMed Central journal article supplement (PMC3504724)
Supplement: supp_M112.413054_jbc.M112.413054-1.pdf [file supp_M112.413054_jbc.M112.413054-1.pdf]

**Supplemental Table S1:** Data collection and refinement statistics for M.HaeIII C71S / DNA pre-extrusion complex InC.

| <b>Data collection</b>                                                |                                               |
|-----------------------------------------------------------------------|-----------------------------------------------|
| Space group                                                           | P2 <sub>1</sub> 2 <sub>1</sub> 2 <sub>1</sub> |
| Cell dimensions                                                       |                                               |
| <i>a</i> , <i>b</i> , <i>c</i> (Å)                                    | 57.56, 129.59,<br>132.38                      |
| α, β, γ (°)                                                           | 90, 90, 90                                    |
| Resolution (Å)                                                        | 17-2.5 (2.6-2.5) <sup>a</sup>                 |
| <i>R</i> <sub>sym</sub> or <i>R</i> <sub>merge</sub> (%) <sup>b</sup> | 12.2 (37)                                     |
| <i>I</i> / <i>σI</i>                                                  | 7.9 (3.4)                                     |
| Completeness (%)                                                      | 90.4 (70.4)                                   |
| Redundancy                                                            | 3.4 (2.5)                                     |
| <b>Refinement</b>                                                     |                                               |
| Resolution (Å)                                                        | 17-2.5                                        |
| No. reflections                                                       | 31673                                         |
| <i>R</i> <sub>work</sub> / <i>R</i> <sub>free</sub> <sup>c</sup>      | 18.2/22.1                                     |
| No. atoms <sup>d</sup>                                                |                                               |
| Protein/DNA                                                           | 7845/711                                      |
| Ligand/ion                                                            | 119/3                                         |
| Water                                                                 | 580                                           |
| B-factors                                                             |                                               |
| Protein/DNA                                                           | 20.0/37.5                                     |
| Ligand/ion                                                            | 51.0/31.4                                     |
| Water                                                                 | 26.9                                          |
| R.m.s deviations                                                      |                                               |
| Bond lengths (Å)                                                      | 0.002                                         |
| Bond angles (°)                                                       | 0.642                                         |
| Ramachandran plot (residues, %)                                       |                                               |
| Most favored                                                          | 90.4                                          |
| Additionally allowed                                                  | 9.6                                           |

Diffraction data from 6 crystals were merged to produce the dataset.

<sup>a</sup> The highest resolution shell is shown in parenthesis.

<sup>b</sup>  $R_{\text{sym}} = R_{\text{merge}} = \frac{\sum_{\text{hkl}} \sum_i |\langle I_{\text{hkl}} \rangle - I_{\text{hkl},i}|}{\sum_{\text{hkl}} \sum_i I_{\text{hkl},i}}$ ; where  $\langle I_{\text{hkl}} \rangle = \frac{\sum_i I_{\text{hkl},i}}{n_{\text{hkl}}}$ ,  $i = 1..n_{\text{hkl}}$ .

<sup>c</sup> *R*<sub>free</sub> calculated using randomly selected subset of the data (4.8%).

<sup>d</sup> Including alternative conformations.

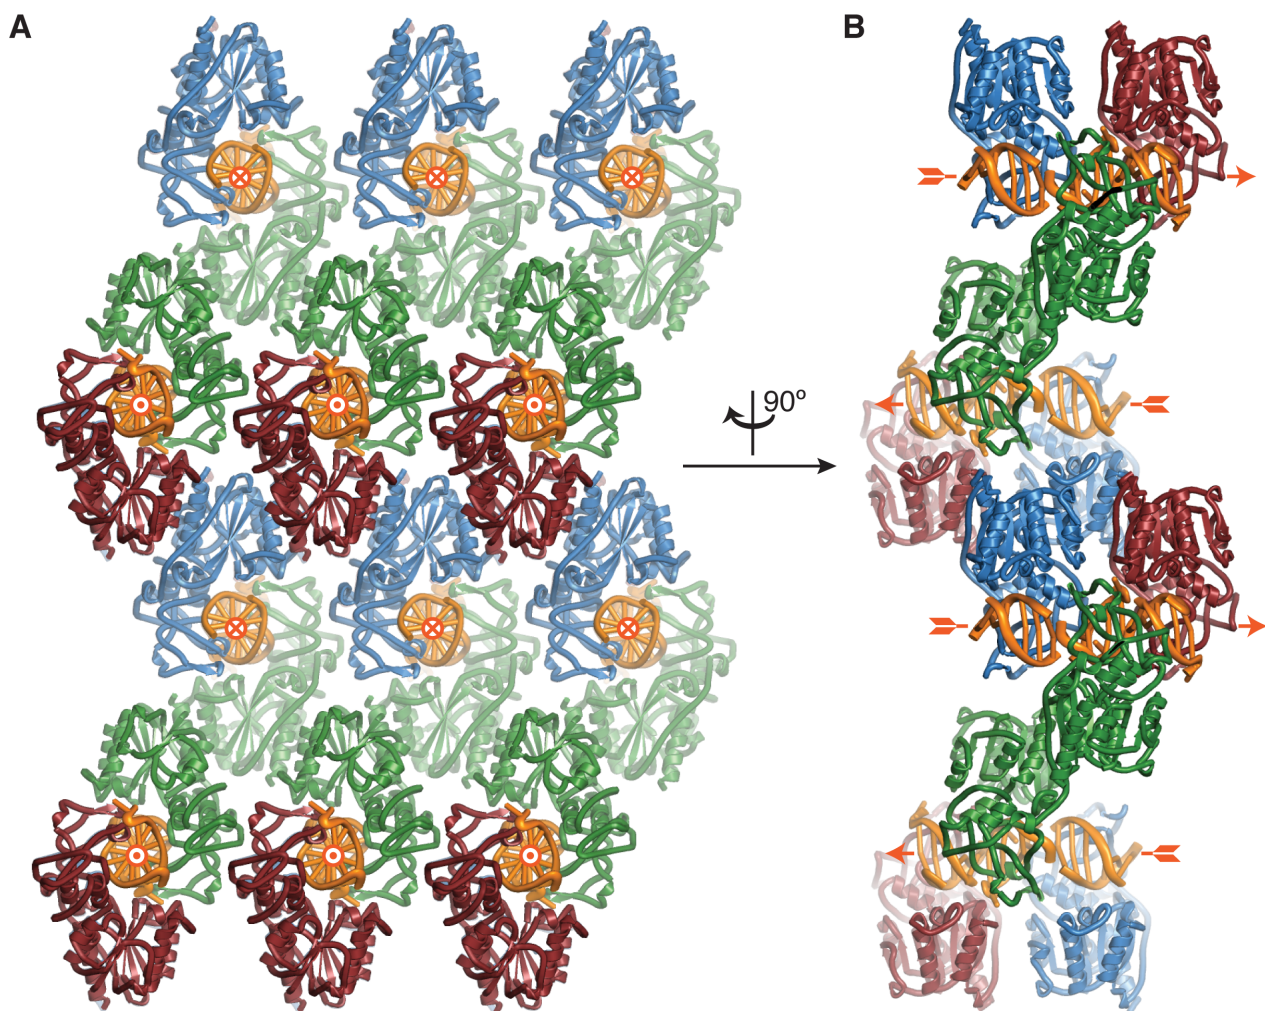

**Supplemental Figure S1.** InC crystal packing. M.HaeIII in Mol A – blue, in Mol B – green, in Mol C – dark-red, DNA – orange. One asymmetric unit contains Mol A–C and three double stranded DNA oligonucleotides. The global helical axes of pseudo-continuous DNA helices in the crystal are shown in dark-orange.

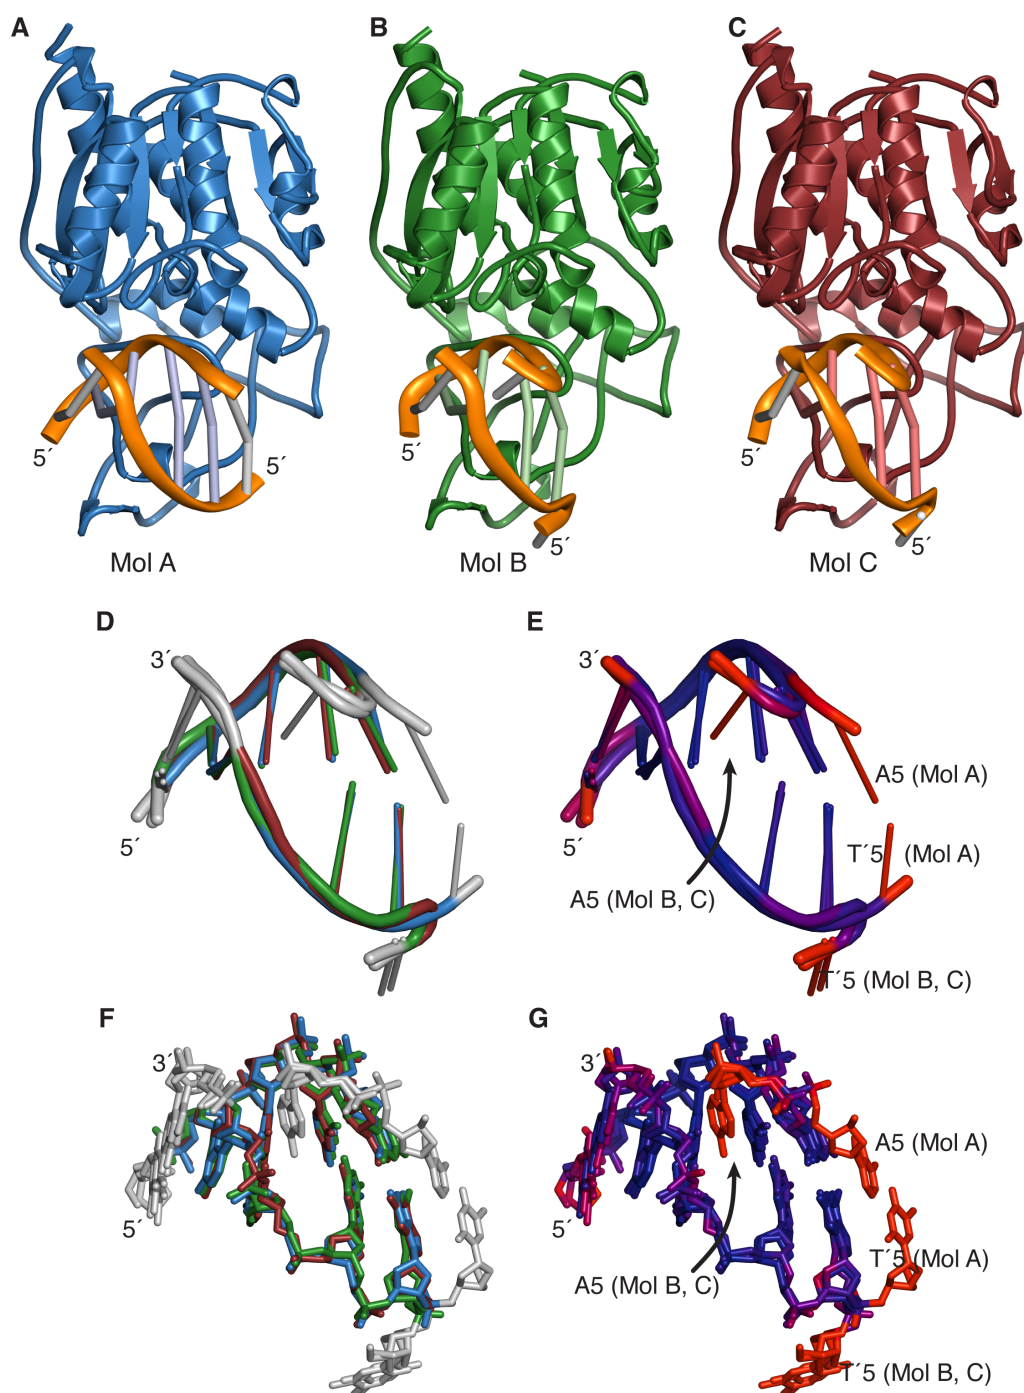

**Supplemental Figure S2.** Comparison of the three DNA molecules in the asymmetric unit of InC crystal. *A, B, C*, M.HaeIII in Mol A – blue, in Mol B – green, in Mol C – dark-red. *D, F*, DNA in Mol A – blue, in Mol B – green, in Mol C – dark-red. Cartoon representation in *D*, sticks representation in *F*. *E, G*, Same representation of DNA in Mol A–C as in *D, F*; corresponding atoms in Mol A–C are colored according to their deviation from a common centre of mass. Only the sugar-phosphate backbone of the 3'-terminal adenine nucleotide (A5) of the target DNA strand (top strand on this figure) in Mol C was included in the model; the corresponding adenine nucleobase was not modeled due to its poor electron density.

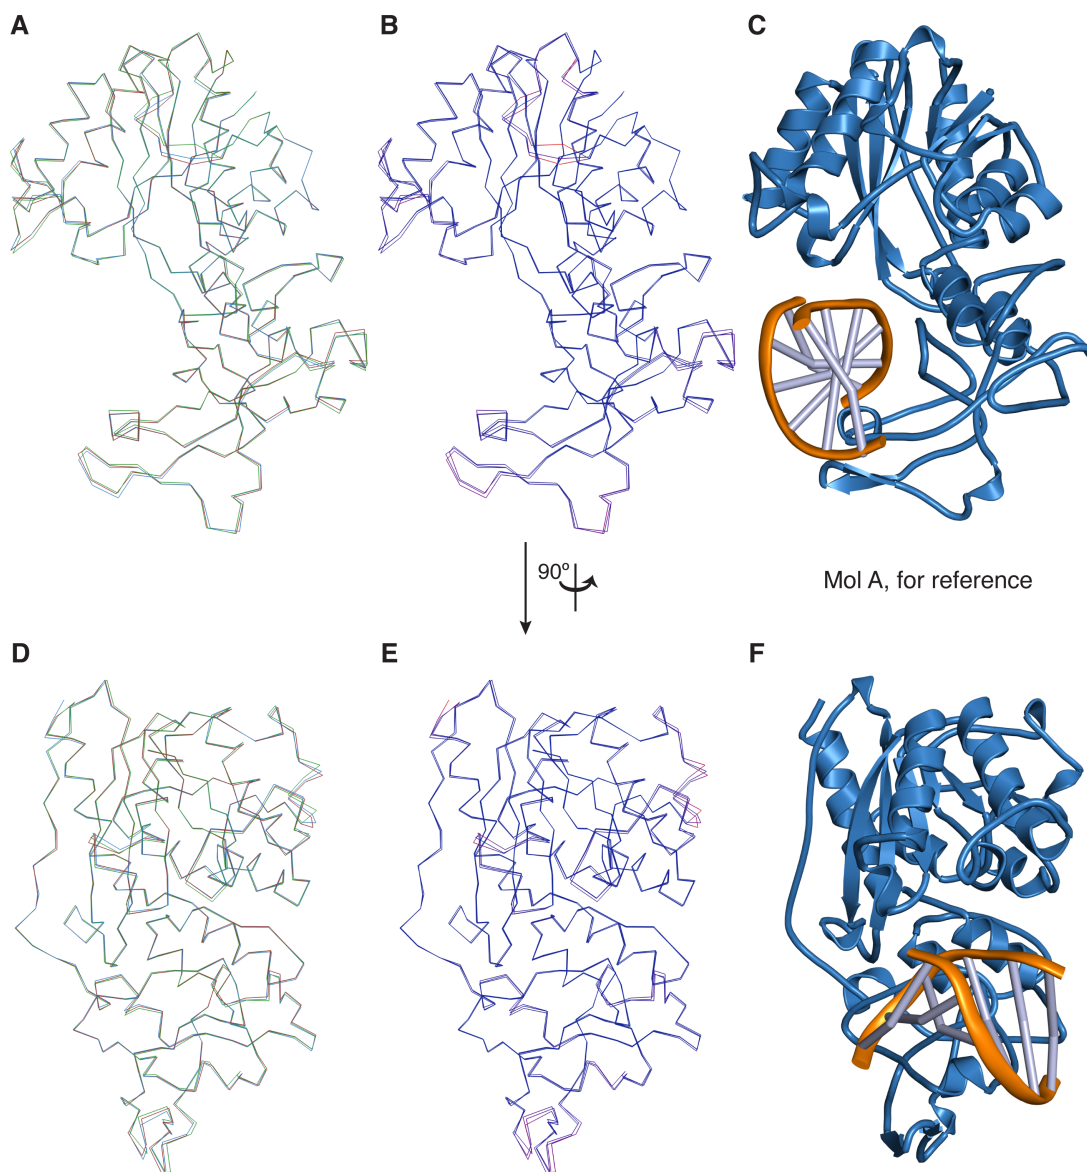

**Supplemental Figure S3.** Comparison of the three M.HaeIII molecules in the asymmetric unit of InC crystal. *A, D*, M.HaeIII in Mol A – blue, in Mol B – green, in Mol C – dark-red. *B, E*, Same orientation as in *A* and *D*; corresponding atoms in Mol A–C are colored according to their deviation from a common centre of mass. *C, F*, M.HaeIII-DNA complex of Mol A is shown for reference. The molecules are represented as  $C_{\alpha}$  ribbons in *A, B, D, E* and as cartoon in *C, F*. M.HaeIII in Mol B and Mol C were superimposed with M.HaeIII in Mol A using all-atom least-squares fit function of Coot.

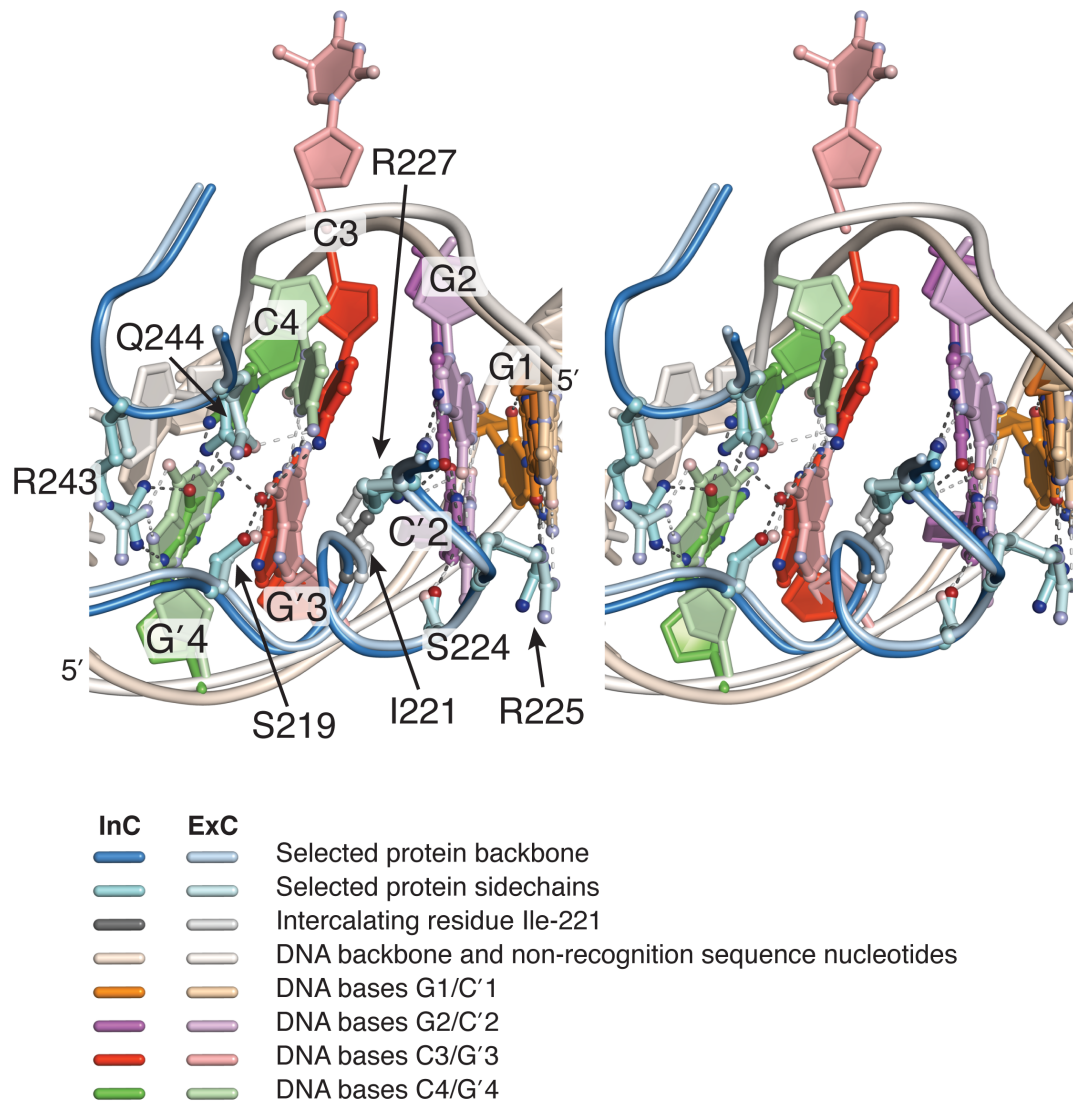

**Supplemental Figure S4.** Overlay of the M.HaeIII DNA sequence specific contacts in InC and ExC. Stereoview of the overlay of the protein-DNA interface in InC (saturated colors) and ExC (light colors), focusing on sequence-specific contacts between the major groove surface of the recognition site in DNA and amino acid side-chains of M.HaeIII. Coding-coding, representation, and orientation as in Fig. 3A, C.
